# Supplementary material
Source: PubMed Central journal article supplement (PMC4250425)
Supplement: NIHMS618874-supplement-01.pdf [file NIHMS618874-supplement-01.pdf]

# **Coverage of protein domain families with structural protein-protein interactions: current progress and future trends**

Alexander Goncarenco, Benjamin A. Shoemaker, Dachuan Zhang, Alexey Sarychev and Anna R. Panchenko\*

Computational Biology Branch of the National Center for Biotechnology Information in Bethesda, Maryland, United States of America

\* [panch@ncbi.nlm.nih.gov](mailto:panch@ncbi.nlm.nih.gov)

## **Supplementary Information**

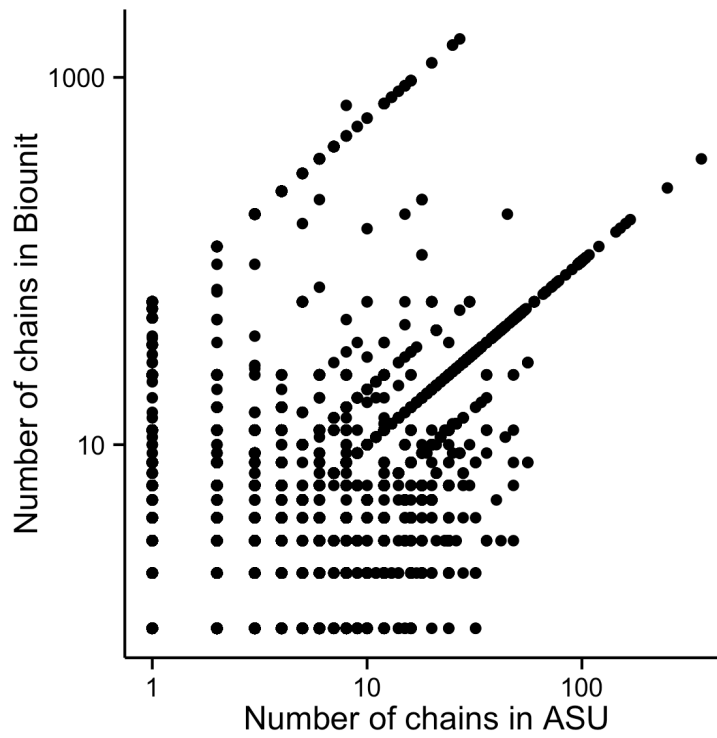

**Figure S1.** The correspondence between the number of chains in the asymmetric unit (ASU) and in the biological assembly (Biounit). Each point represents a structure in MMDB/PDB database.

**Table S1.** Estimates of structural and PPI coverage yearly growth rates and the yearly database growth rates for families and superfamilies in CDD and Pfam.

**A.** Structural coverage is the numbers of families having at least one representative structure deposited by a given year. PPI coverage is the number of families having at least one structure with at least one protein-binding site. We consider the families and superfamilies in CDD 3.11 and families in Pfam 27 and take the numbers of structural and PPI coverage for the years of 2012 and 2007. Based on the increase of coverage in this period we estimate the yearly growth rate. We assume that the coverage growth is linear and the growth rate will not change in the future. For this estimate we assume that the number of families and superfamilies is constant. We take the most recent coverage (in year 2014 for CDD and year 2013 for Pfam) and estimate the projected coverage in the year of 2020 given the current coverage growth rates.

| Database          | Type of coverage | 2012 | 2007 | Yearly increase in coverage | Current coverage | Projected coverage in 2020 |
|-------------------|------------------|------|------|-----------------------------|------------------|----------------------------|
| CDD Superfamilies | Structural       | 918  | 765  | 30.6                        | 927              | 1110.6                     |
| CDD Superfamilies | PPI              | 789  | 648  | 28.2                        | 794              | 963.2                      |
| CDD Families      | Structural       | 4657 | 3568 | 217.8                       | 4750             | 6056.8                     |
| CDD Families      | PPI              | 2841 | 2057 | 156.8                       | 2912             | 3852.8                     |
| PFAM Families     | Structural       | 5749 | 4700 | 209.8                       | 5749             | 7217.6                     |
| PFAM Families     | PPI              | 3740 | 2936 | 160.8                       | 3740             | 4865.6                     |

**B.** Yearly increment in the number of (super)families covered by structures or PPI interactions by structures deposited during the year, starting with year 2000.

| Year | Pfam families, structural coverage | Pfam families, PPI coverage | CDD families, structural coverage | CDD families, PPI coverage | CDD superfam. structural coverage | CDD superfam. PPI coverage |
|------|------------------------------------|-----------------------------|-----------------------------------|----------------------------|-----------------------------------|----------------------------|
| 2000 | 322                                | 208                         | 253                               | 161                        | 63                                | 52                         |
| 2001 | 352                                | 218                         | 237                               | 140                        | 50                                | 40                         |
| 2002 | 305                                | 182                         | 206                               | 104                        | 28                                | 29                         |
| 2003 | 400                                | 238                         | 269                               | 149                        | 29                                | 27                         |
| 2004 | 466                                | 276                         | 344                               | 181                        | 24                                | 28                         |
| 2005 | 445                                | 269                         | 415                               | 193                        | 26                                | 32                         |
| 2006 | 421                                | 301                         | 359                               | 198                        | 23                                | 35                         |
| 2007 | 430                                | 294                         | 320                               | 210                        | 19                                | 30                         |
| 2008 | 297                                | 202                         | 203                               | 154                        | 15                                | 17                         |
| 2009 | 274                                | 228                         | 290                               | 205                        | 27                                | 38                         |
| 2010 | 259                                | 197                         | 222                               | 159                        | 19                                | 18                         |
| 2011 | 172                                | 153                         | 202                               | 135                        | 41                                | 31                         |
| 2012 | 47                                 | 24                          | 172                               | 131                        | 29                                | 37                         |
| 2013 |                                    |                             | 85                                | 69                         | 8                                 | 5                          |
| 2014 |                                    |                             | 8                                 | 2                          | 1                                 |                            |

**C.** Increment in the number of families and superfamilies defined in different releases in CDD and Pfam. For CDD we take the average number of new (super)families (listed in section D below) between the years 2009 and 2013 as the yearly growth rate. For Pfam we take the difference in size of the database between years 2008 and 2013 and calculate the average yearly growth rate. Based on the number of families in the latest versions of the databases we estimate the projected database sizes in the year of 2020.

| Database                 | Yearly database growth rate | Current database size | Projected database size in 2020 |
|--------------------------|-----------------------------|-----------------------|---------------------------------|
| <b>CDD Superfamilies</b> | 75                          | 1060                  | 1510                            |
| <b>CDD Families</b>      | 1220.4                      | 9860                  | 17182.4                         |
| <b>PFAM Families</b>     | 898.2                       | 14831                 | 21118.4                         |

**D.** The number of CDD families and superfamilies added every year between 2008 and 2014. The number includes singleton superfamilies and only counts the models currently marked as active and the superfamilies with at least one NCBI-curated model.

| <b>Year</b> | <b>New superfamilies</b> | <b>New families</b> |
|-------------|--------------------------|---------------------|
| 2008        | 556                      | 752                 |
| 2009        | 40                       | 673                 |
| 2010        | 36                       | 1623                |
| 2011        | 111                      | 1498                |
| 2012        | 85                       | 1045                |
| 2013        | 103                      | 1263                |
| 2014        | 83                       |                     |
